# Supplementary material for: A Computational Inter-Species Study on Safrole Phase I Metabolism-Dependent Bioactivation: A Mechanistic Insight into the Study of Possible Differences among Species
Source: MDPI journal article supplement (doi:10.3390/toxins15020094), 2023-01-18
Supplement: s1 [file toxins-2086787-supplementary.pdf › toxins-2086787-supplementary.pdf]

# **Supplementary Materials**

**A Computational Inter-Species Study on Safrole Phase I Metabolism-Dependent Bioactivation: A Mechanistic Insight into the Study of Possible Differences among Species**

**Table S1.** Expression data for considered CYPs at the liver level in the species under analysis.

| Species | CYP2A6 and its homologues              |                               |                   | CYP1A2                       |                               |                   |
|---------|----------------------------------------|-------------------------------|-------------------|------------------------------|-------------------------------|-------------------|
|         | UniProt <sup>1</sup>                   | Expression Atlas <sup>2</sup> | Bgee <sup>3</sup> | UniProt <sup>1</sup>         | Expression Atlas <sup>2</sup> | Bgee <sup>3</sup> |
| Human   | Evidence at protein level              | 692010 parts per billion      | 98.57             | Evidence at protein level    | 519668 parts per billion      | 95.32             |
| Rat     | Evidence at transcript level           | n.a.                          | n.a.              | Evidence at protein level    | n.a.                          | 98.65             |
| Mouse   | Evidence at transcript level           | 37033 parts per billion       | 91.96             | Evidence at protein level    | 216750 parts per billion      | 99.16             |
| Cat     | Inferred from homology                 | n.a.                          | 99.5              | Evidence at transcript level | n.a.                          | 98.42             |
| Dog     | Evidence at transcript level           | n.a.                          | 75.43             | Evidence at protein level    | n.a.                          | 74.07             |
| Pig     | Evidence at protein level              | n.a.                          | 96.28             | Evidence at protein level    | n.a.                          | 97.64             |
| Goat    | Inferred from homology                 | n.a.                          | 96.66             | Inferred from homology       | n.a.                          | 88.84             |
| Rabbit  | Evidence at protein level<br>(CYP2A10) | n.a.                          | 99.49             | Evidence at protein level    | n.a.                          | 99.46             |
|         | Evidence at protein level<br>(CYP2A11) | n.a.                          | n.a.              |                              |                               |                   |
| Chicken | ---                                    | ---                           | ---               | Evidence at transcript level | n.a.                          | 94.68             |
| Sheep   | Evidence at transcript level           | n.a.                          | 53.57             | n.a.                         | n.a.                          | 58.23             |

*Note:* <sup>1</sup> Information of protein existence according to UniProt database (<https://www.uniprot.org>); <sup>2</sup> Data at protein level was considered (if any) and the highest value was reported according to Expression Atlas database (<https://www.ebi.ac.uk/gxa/home>); <sup>3</sup> Expression scores according to Bgee database (<https://bgee.org>) are reported; “n.d.” stands for “data not available”.

**Table S2.** Accession code and percentage identity of animal homologs to human CYP2A6.

| Species <sup>1</sup> | Homolog to CYP2A6    | Identity % to human CYP2A6 |
|----------------------|----------------------|----------------------------|
| Rat (10116)          | P20812 (CYP2A3)      | 85.38%                     |
| Mouse (10090)        | P20852 (CYP2A5)      | 85.59%                     |
| Dog (9615)           | Q307K8 (CYP2A13)     | 88.87%                     |
| Rabbit (9986)        | Q05555 (CYP2A10)     | 83.69%                     |
|                      | Q05556 (CYP2A11)     | 83.47%                     |
| Pig (9823)           | Q8SQ68 (CYP2A19)     | 86.44%                     |
| Goat (9925)          | A0A452DNG6 (CYP2A13) | 88.35%                     |
| Sheep (9940)         | F1CGV2 (CYP2A6)      | 88.54%                     |
| Cat (9685)           | M3W9T6 (CYP2A13)     | 86.65%                     |
| Chicken (9031)       | ND <sup>2</sup>      | < 50%                      |

*Note:* <sup>1</sup> the species taxon ID is reported between brackets; <sup>2</sup> ND stands for data not found, meaning that the identity percentage to the human homolog was lower than 50% at the time of analysis (last database access 8<sup>th</sup> July 2022).

**Table S3.** Accession number for animal homolog to human CYP1A2 or CYP2A6.

| Species <sup>1</sup> | Homolog to CYP1A2 | Homolog to CYP2A6    |
|----------------------|-------------------|----------------------|
| Rat (10116)          | P04799            | P20812 (CYP2A3)      |
| Mouse (10090)        | P00186            | P20852 (CYP2A5)      |
| Dog (9615)           | P56592            | Q307K8 (CYP2A13)     |
| Rabbit (9986)        | P00187            | Q05555 (CYP2A10)     |
|                      |                   | Q05556 (CYP2A11)     |
| Pig (9823)           | F1SJ26            | Q8SQ68 (CYP2A19)     |
| Goat (9925)          | A0A452EFF2        | A0A452DNG6 (CYP2A13) |
| Sheep (9940)         | XP027812985       | F1CGV2 (CYP2A6)      |
| Cat (9685)           | Q5KQT6            | M3W9T6 (CYP2A13)     |
| Chicken (9031)       | Q01741            | ND <sup>2</sup>      |

*Note:* <sup>1</sup> the species taxon ID is reported between brackets; <sup>2</sup> ND stands for data not found, meaning that the identity percentage to the human homolog was lower than 50% at the time of analysis (last database access 8<sup>th</sup> July 2022).

**Table S4.** Structural comparison between the CYP2A6 homology modelling structures obtained using Modeller and the AlphaFold Protein Structure Database.

| Species <sup>1</sup> | Homolog to CYP2A6    | RMSD (Å) <sup>2</sup> | RMSD (Å) <sup>3</sup> | RMSD (Å) <sup>4</sup> |
|----------------------|----------------------|-----------------------|-----------------------|-----------------------|
| Rat (10116)          | P20812 (CYP2A3)      | 0.27                  | 0.32                  | 0.35                  |
| Mouse (10090)        | P20852 (CYP2A5)      | 0.28                  | 0.33                  | 0.37                  |
| Dog (9615)           | Q307K8 (CYP2A13)     | 0.28                  | 0.33                  | 0.62                  |
| Rabbit (9986)        | Q05555 (CYP2A10)     | 0.27                  | 0.42                  | 0.42                  |
|                      | Q05556 (CYP2A11)     | 0.27                  | 0.42                  | 0.42                  |
| Pig (9823)           | Q8SQ68 (CYP2A19)     | 0.27                  | 0.31                  | 0.33                  |
| Goat (9925)          | A0A452DNG6 (CYP2A13) | 0.28                  | 0.31                  | 0.34                  |
| Sheep (9940)         | F1CGV2 (CYP2A6)      | 0.28                  | 0.31                  | 0.33                  |
| Cat (9685)           | M3W9T6 (CYP2A13)     | 0.27                  | 0.32                  | 0.34                  |

*Note:* <sup>1</sup> species taxon ID is reported between brackets; <sup>2</sup> RMSD computed superimposing the structure obtained via homology modelling using Modeller and the human CYP2A6 (PDB ID 2PG6); <sup>3</sup> RMSD computed superimposing the structure obtained from the AlphaFold Protein Structure Database and the human CYP2A6 (PDB ID 2PG6); <sup>4</sup> RMSD computed superimposing the structure obtained via Homology modelling and the one obtained on the AlphaFold Protein Structure Database.

**Table S5.** Structural comparison between the CYP1A2 homology modelling structures obtained using Modeller and the AlphaFold Protein Structure Database.

| Species <sup>1</sup> | RMSD (Å) <sup>2</sup> | RMSD (Å) <sup>3</sup> | RMSD (Å) <sup>4</sup> |
|----------------------|-----------------------|-----------------------|-----------------------|
| Rat (10116)          | 0.33                  | 0.40                  | 0.41                  |
| Mouse (10090)        | 0.30                  | 0.43                  | 0.44                  |
| Dog (9615)           | 0.17                  | 0.38                  | 0.39                  |
| Rabbit (9986)        | 0.17                  | 0.44                  | 0.46                  |
| Chicken (9031)       | 0.25                  | 0.57                  | 0.58                  |
| Pig (9823)           | 0.16                  | 0.39                  | 0.40                  |
| Goat (9925)          | 0.15                  | 0.38                  | 0.38                  |
| Sheep (9940)         | 0.17                  | 0.73*                 | 0.72*                 |
| Cat (9685)           | 0.18                  | 0.48                  | 0.63                  |

*Note:* <sup>1</sup> species taxon ID is reported between brackets; <sup>2</sup> RMSD computed superimposing the structure obtained via homology modelling using Modeller and the human CYP1A2 (PDB ID 2HI4); <sup>3</sup> RMSD computed superimposing the structure obtained from the AlphaFold Protein Structure Database and the human CYP1A2 (PDB ID 2HI4); <sup>4</sup> RMSD computed superimposing the structure obtained via homology modelling using Modeller and the one obtained on the AlphaFold Protein Structure Database.\* The sheep CYP1A2 was not available on the AlphaFold Protein Structure Database and was then computed via the AlphaFold2 Colab notebook using default parameter (<https://colab.research.google.com/github/sokrypton/ColabFold/blob/main/AlphaFold2.ipynb>).

**Table S6.** Average predicted binding energy of the complexes under analysis

| <b>Molecule</b> | <b>Species CYP</b> | <b><math>\Delta G</math> (Kcal/mol) <sup>1</sup></b> | <b>Number of clusters <sup>2</sup></b> |
|-----------------|--------------------|------------------------------------------------------|----------------------------------------|
| Estragole       | Human 1A2          | -7.20                                                | 1                                      |
|                 | Human 2A6          | -7.00                                                | 1                                      |
| Coumarin        | Human 2A6          | -7.10                                                | 1                                      |
|                 | Rat 2A3            | -7.00                                                | 1                                      |
| Safrole         | Human 1A2          | -7.30                                                | 1                                      |
|                 | Human 2A6          | -7.20                                                | 1                                      |
|                 | Cat 1A2            | -7.40                                                | 1                                      |
|                 | Cat 2A13           | -7.25 $\pm$ 0.05 *                                   | 3                                      |
|                 | Chicken 1A2        | -7.30                                                | 1                                      |
|                 | Dog 1A2            | -7.30                                                | 1                                      |
|                 | Dog 2A13           | -7.30                                                | 1                                      |
|                 | Goat 1A2           | -7.30                                                | 1                                      |
|                 | Goat 2A13          | -7.10                                                | 1                                      |
|                 | Mouse 1A2          | -7.20                                                | 1                                      |
|                 | Mouse 2A5          | -7.20                                                | 1                                      |
|                 | Pig 1A2            | -7.40                                                | 1                                      |
|                 | Pig 2A19           | -7.20                                                | 1                                      |
|                 | Rat 1A2            | -7.20                                                | 1                                      |
|                 | Rat 2A3            | -7.30                                                | 1                                      |
|                 | Rabbit 1A2         | -7.30                                                | 1                                      |
|                 | Rabbit 2A10        | -7.30                                                | 1                                      |
|                 | Rabbit 2A11        | -7.30                                                | 1                                      |
|                 | Sheep 1A2          | -7.20                                                | 1                                      |
|                 | Sheep 2A6          | -7.20                                                | 1                                      |

*Note:* <sup>1</sup> Binding energy computed on the PRODIGY web application on the cluster's representative complex (<https://wenmr.science.uu.nl/prodigy/lig>); <sup>2</sup> Number of clusters retrieved along the whole molecular dynamicssimulation; \* The value reported represents the average value of each representative cluster.

### Human

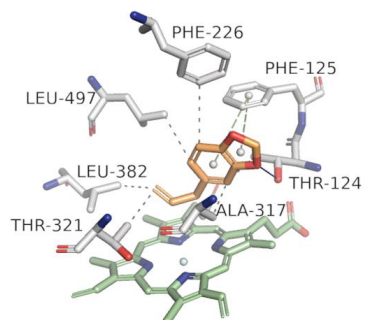

### Chicken

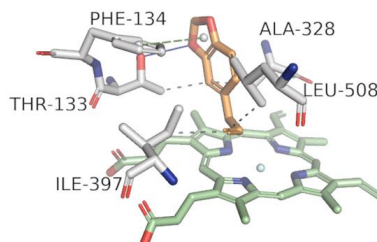

- Hydrogen Bond
- ...  $\pi$ -Stacking
- Aromatic Ring Center
- ... Hydrophobic Interaction

### Dog

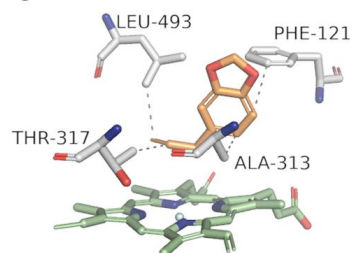

### Goat

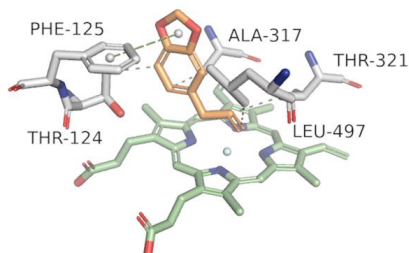

### Cat

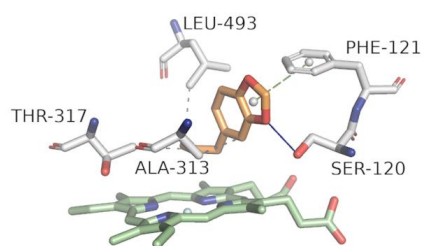

### Mouse

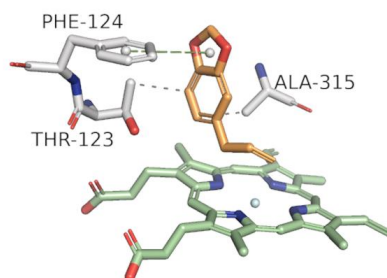

### Pig

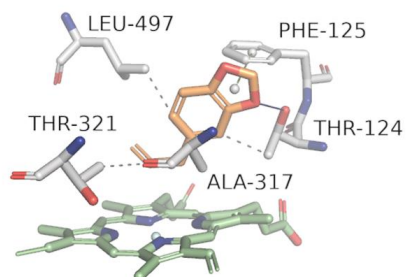

### Rabbit

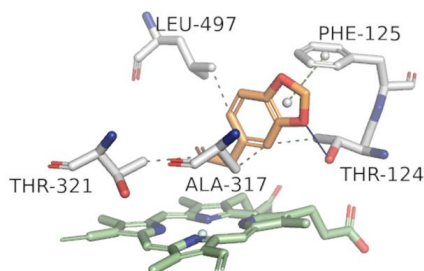

### Rat

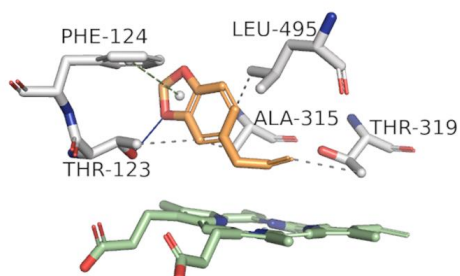

### Sheep

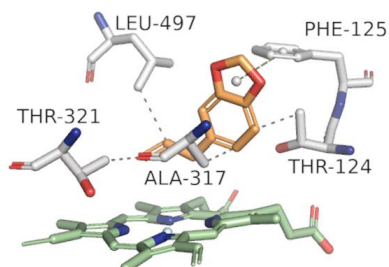

**Figure S1.** Binding architecture of safole in complex with human CYP1A2 and its animal homologs. Protein is shown in white sticks, ligand in yellow and heme in green.

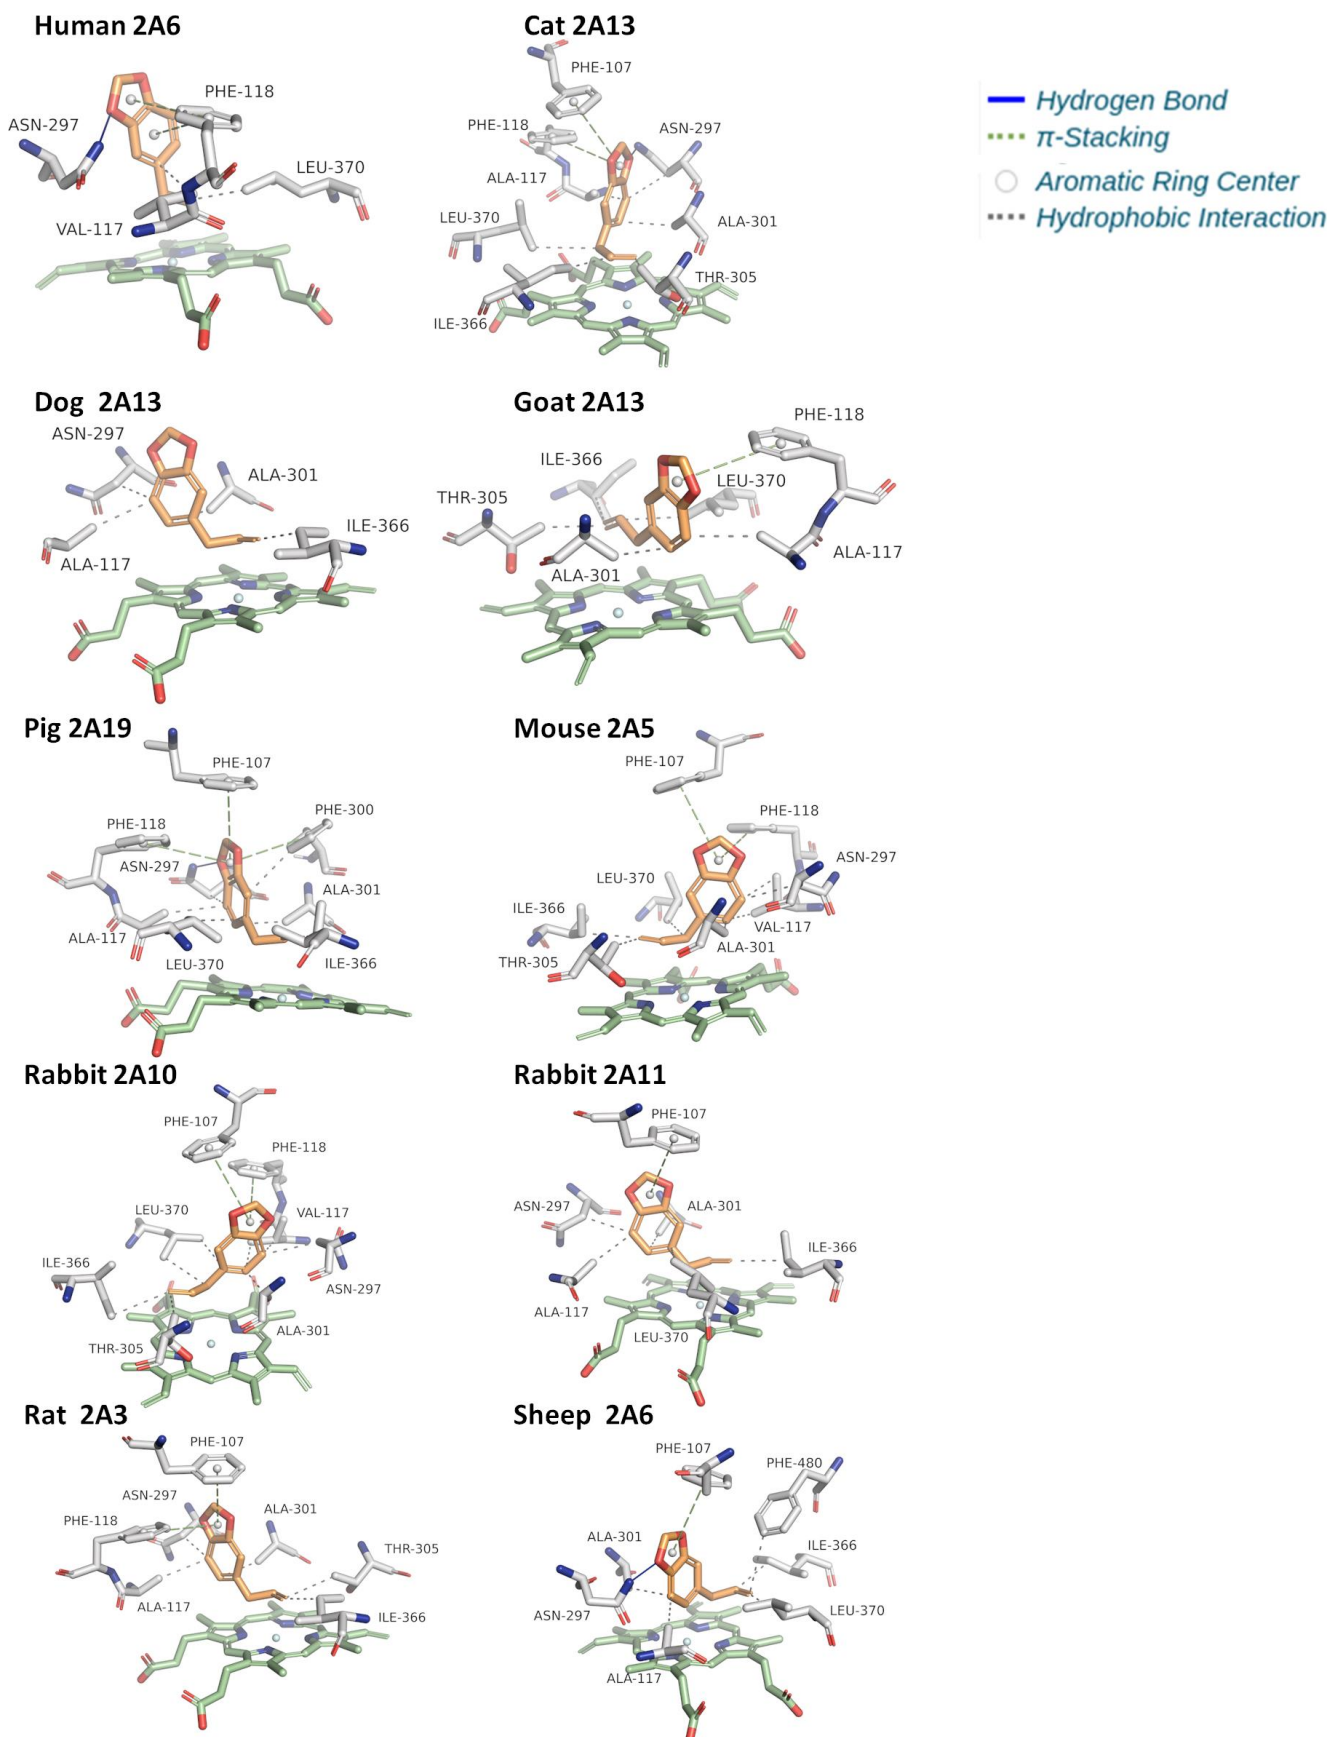

**Figure S2.** Binding architecture of safrole in complex with human CYP2A6 and its animal homologs. Protein is shown in white sticks, ligand in yellow and heme in green.

**A****Human 1A2**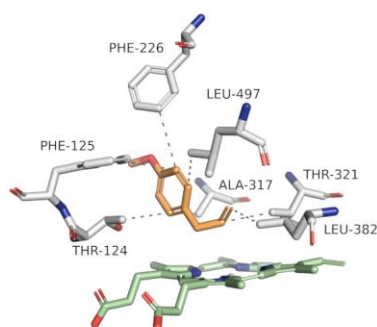**Human 2A6**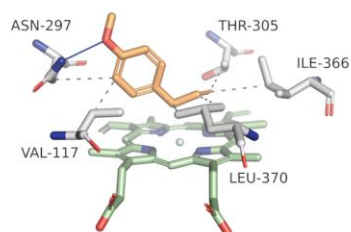

— Hydrogen Bond  
...  $\pi$ -Stacking  
○ Aromatic Ring Center  
... Hydrophobic Interaction

**B****Human 2A6**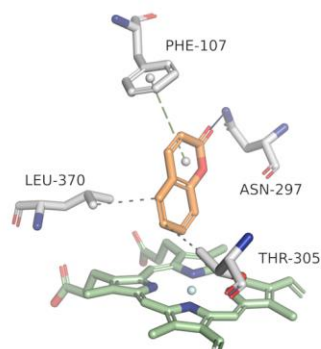**Rat 2A3**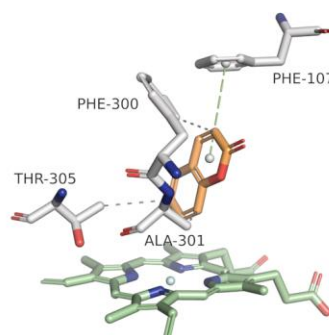

**Figure S3.** Binding architecture of estragole within human CYP1A2 and CYP2A6 (**A**) and coumarin in human CYP2A6 and rat CYP2A3 (**B**). Protein is shown in white sticks, ligand in yellow and heme in green.



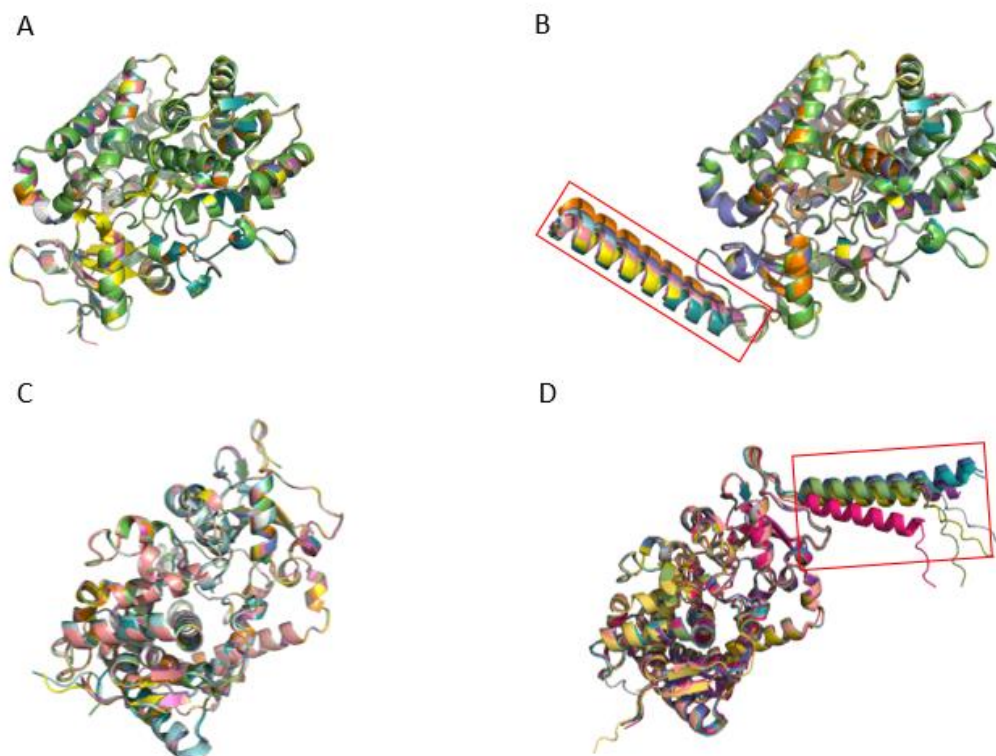

**Figure S4.** Structural alignment of the animals' CYPs homologues over the human CYP2A6 (PDB ID 2PG6) and CYP1A2 (PDB ID 2HI4). **A)** CYP2A6 animal homologues structures obtained via the homology modelling procedure based on Modeller superimposed to the human CYP2A6 (PDB ID 2PG6). **B)** CYP2A6 animal homologues structures retrieved from the AlphaFold Protein Structure Database superimposed to the human CYP2A6 (PDB ID 2PG6). The main difference to structures reported in figure A is the transmembrane helix (within the red box), which was not relevant for the present study. **C)** CYP1A2 animal homologues structures obtained via the homology modelling procedure based on Modeller superimposed to the human CYP1A2 (PDB ID 2HI4). **D)** CYP1A2 animal homologues structures retrieved from the AlphaFold Protein Structure Database superimposed to the human CYP1A2 (PDB ID 2HI4). The main difference to structures reported in figure C is the transmembrane helix (within the red box), which was not relevant for the present study.

```
#
#
# CYP2A6 Percent Identity Matrix - created by Clustal2.1
#
#
```

|                |        |        |        |        |        |        |        |        |        |        |
|----------------|--------|--------|--------|--------|--------|--------|--------|--------|--------|--------|
| 1: Human-2a6   | 100.00 | 83.69  | 83.47  | 85.59  | 85.38  | 86.65  | 88.77  | 86.44  | 88.54  | 88.35  |
| 2: Rabbit-2a10 | 83.69  | 100.00 | 98.38  | 86.23  | 86.03  | 85.83  | 87.45  | 87.85  | 89.05  | 88.87  |
| 3: Rabbit-2a11 | 83.47  | 98.38  | 100.00 | 86.44  | 86.64  | 86.44  | 88.06  | 88.66  | 89.66  | 89.47  |
| 4: Mouse-2a5   | 85.59  | 86.23  | 86.44  | 100.00 | 96.15  | 86.23  | 89.07  | 89.07  | 89.25  | 89.27  |
| 5: Rat-2a3     | 85.38  | 86.03  | 86.64  | 96.15  | 100.00 | 87.25  | 90.08  | 88.87  | 89.86  | 89.68  |
| 6: Cat-2a13    | 86.65  | 85.83  | 86.44  | 86.23  | 87.25  | 100.00 | 94.13  | 91.30  | 91.89  | 92.11  |
| 7: Dog-2a13    | 88.77  | 87.45  | 88.06  | 89.07  | 90.08  | 94.13  | 100.00 | 92.11  | 93.31  | 93.12  |
| 8: Pig-2a19    | 86.44  | 87.85  | 88.66  | 89.07  | 88.87  | 91.30  | 92.11  | 100.00 | 93.10  | 93.32  |
| 9: Sheep-2a6   | 88.54  | 89.05  | 89.66  | 89.25  | 89.86  | 91.89  | 93.31  | 93.10  | 100.00 | 99.39  |
| 10: Goat-2a13  | 88.35  | 88.87  | 89.47  | 89.27  | 89.68  | 92.11  | 93.12  | 93.32  | 99.39  | 100.00 |

**Figure S5.** Percent Identity Matrices (PIMs) for CYP2A6 homologs.
